# Supplementary material
Source: HighWire-hosted journal article supplement (https://cmaj.ca/highwire/filestream/58307/field_highwire_adjunct_files/0/pap-ioannidis-1-at.pdf)
Supplement: pap-ioannidis-1-at.pdf [file pap-ioannidis-1-at.pdf]

## Appendix 1 (as submitted by the authors)

**Table A:** Eligible CEAs included in the analyses

| Appendix reference No | Author           | Journal                          | Year | Country         | Strategies incorporated | Preferred strategy       | Grade         | Affiliation with manufacturer | Funding from manufacturer | Conflict of interest | Other source of funding |
|-----------------------|------------------|----------------------------------|------|-----------------|-------------------------|--------------------------|---------------|-------------------------------|---------------------------|----------------------|-------------------------|
| 1                     | Levin CE         | Int J Cancer                     | 2010 | China           | CC vs Commercial method | Commercial method        | Other         | No                            | No                        | No                   | Private                 |
| 2                     | Liu PH           | BMC Health Serv Res              | 2010 | Taiwan          | CC vs Commercial method | CC and Commercial method | >LSIL         | No                            | No                        | Yes                  | Public                  |
| 3                     | Dasbach EJ       | J Med Econ                       | 2010 | Hungary         | CC vs Commercial method | CC and Commercial method | HSIL          | Yes                           | Yes                       | Yes                  | No                      |
| 4                     | Kulasingam SL    | BMC Med                          | 2009 | Canada          | CC vs Commercial method | Commercial method        | >LSIL<br>HSIL | No                            | No                        | Yes                  | Public                  |
| 5                     | Chuck A          | Value Health                     | 2009 | Canada          | CC vs Commercial method | CC and Commercial method | Other         | No                            | No                        | No                   | Public                  |
| 6                     | Vijayaraghavan A | Gynecol Oncol                    | 2009 | South Africa    | CC vs Commercial method | CC and Commercial method | >LSIL<br>HSIL | Yes                           | Yes                       | Yes                  | No                      |
| 7                     | Coupe VMH        | Int J Cancer                     | 2009 | the Netherlands | CC vs Commercial method | CC or Commercial method  | LSIL<br>Other | No                            | Yes                       | No                   | No                      |
| 8                     | Mennini FS       | Gynecol Oncol                    | 2009 | Italy           | CC vs Commercial method | CC and Commercial method | Other         | Yes                           | No                        | Yes                  | No                      |
| 9                     | Thiry N          | Int J Technol Assess Health Care | 2009 | Belgium         | CC vs Commercial method | CC and Commercial        | Other         | No                            | No                        | No                   | Public                  |

**Appendix to:** Polyzos NP, Valachis A, Mauri D, et al. Industry involvement and baseline assumptions of cost-effectiveness analyses: diagnostic accuracy of the Papanicolaou test. *CMAJ* 2011. DOI:10.1503/cmaj.101506.

Copyright © 2011 Canadian Medical Association or its licensors

|    |                        |                    |      |                            |                         | method                   |               |     |     |     |                |
|----|------------------------|--------------------|------|----------------------------|-------------------------|--------------------------|---------------|-----|-----|-----|----------------|
| 10 | Anonychuk AM           | BMC Public Health  | 2009 | Canada                     | CC vs Commercial method | CC and Commercial method | Other         | Yes | Yes | Yes | No             |
| 11 | Colantonio L           | Vaccine            | 2009 | 5 Latin American countries | CC vs Commercial method | CC and Commercial method | LSIL<br>HSIL  | Yes | Yes | Yes | No             |
| 12 | Coupe VMH              | Vaccine            | 2009 | the Netherlands            | CC vs Commercial method | CC and Commercial method | LSIL<br>Other | No  | Yes | No  | No             |
| 13 | de Kok IMCM            | J Natl Cancer Inst | 2009 | the Netherlands            | CC vs Commercial method | CC and Commercial method | LSIL<br>Other | No  | Yes | No  | No             |
| 14 | Kim JJ                 | BMJ                | 2009 | USA                        | CC vs Commercial method | CC                       | LSIL<br>HSIL  | No  | No  | No  | Private+Public |
| 15 | Reynales-Shigematsu LM | Arch Med Res       | 2009 | Mexico                     | CC vs Commercial method | CC and Commercial method | HSIL          | No  | Yes | No  | Public         |
| 16 | Rogoza RM              | Vaccine            | 2009 | the Netherlands            | CC vs Commercial method | Commercial method        | Other         | Yes | No  | No  | No             |
| 17 | Zechmeister I          | Vaccine            | 2009 | Austria                    | CC vs Commercial method | CC and Commercial method | LSIL<br>Other | No  | No  | No  | Public         |
| 18 | Annemans J             | Pharmacoeconomics  | 2009 | Belgium                    | CC vs Commercial method | CC and Commercial method | LSIL<br>HSIL  | Yes | Yes | Yes | No             |
| 19 | Kim JJ                 | Ann Intern Med     | 2009 | USA                        | CC vs Commercial method | CC and Commercial method | LSIL          | No  | No  | No  | Public         |

|    |                      |                                                      |      |             |                                       |                                                   |       |     |     |     |         |
|----|----------------------|------------------------------------------------------|------|-------------|---------------------------------------|---------------------------------------------------|-------|-----|-----|-----|---------|
|    |                      |                                                      |      |             |                                       |                                                   | HSIL  |     |     |     |         |
| 20 | Ginsberg GM          | Vaccine                                              | 2009 | Global      | CC vs Commercial method               | CC and Commercial method <sup>a</sup>             | LSIL  | No  | No  | NR  | No      |
| 21 | Kim JJ               | Vaccine                                              | 2008 | Vietnam     | CC vs Commercial method               | CC and Commercial method-not vaccine <sup>b</sup> | LSIL  | No  | No  | No  | Private |
|    |                      |                                                      |      |             |                                       |                                                   | HSIL  |     |     |     |         |
| 22 | Krahn M              | Canadian Agency for Drugs and Technologies in Health | 2008 | Canada      | CC vs Commercial method               | CC and Commercial method                          | LSIL  | No  | No  | No  | Public  |
|    |                      |                                                      |      |             |                                       |                                                   | HSIL  |     |     |     |         |
| 23 | Andres-Gamboa O      | Salud Pub Mex                                        | 2008 | Columbia    | CC vs Commercial method               | CC and Commercial method                          | HSIL  | No  | No  | No  | No      |
| 24 | Anderson R           | ANZ J Public Health                                  | 2008 | Australia   | Only different CC strategies involved | CC                                                | >LSIL | No  | No  | No  | Public  |
| 25 | Bergeron C           | Int J Technol Assess Health Care                     | 2008 | France      | CC vs Commercial method               | CC and Commercial method                          | LSIL  | Yes | Yes | Yes | No      |
|    |                      |                                                      |      |             |                                       |                                                   | HSIL  |     |     |     |         |
| 26 | Szucs TD             | Curr Med Res Opin                                    | 2008 | Switzerland | CC vs Commercial method               | CC and Commercial method                          | Other | Yes | Yes | Yes | No      |
| 27 | Diaz M               | Br J Cancer                                          | 2008 | India       | CC vs Commercial method               | Commercial method                                 | LSIL  | No  | No  | No  | Private |
|    |                      |                                                      |      |             |                                       |                                                   | HSIL  |     |     |     |         |
| 28 | Goldhaber-Fiebert JD | J Natl Cancer Inst                                   | 2008 | USA         | CC vs Commercial method               | CC and Commercial method                          | LSIL  | No  | No  | No  | Public  |
|    |                      |                                                      |      |             |                                       |                                                   | HSIL  |     |     |     |         |
| 29 | Dasbach EJ           | BJOG                                                 | 2008 | UK          | CC vs Commercial method               | CC and Commercial method                          | LSIL  | Yes | Yes | Yes | No      |
|    |                      |                                                      |      |             |                                       |                                                   | HSIL  |     |     |     |         |

|    |                     |                                          |      |                                          |                         |                                      |              |     |     |     |                |
|----|---------------------|------------------------------------------|------|------------------------------------------|-------------------------|--------------------------------------|--------------|-----|-----|-----|----------------|
| 30 | Gutierrez-Delgado C | Salud Pub Mex                            | 2008 | Mexico                                   | CC vs Commercial method | Commercial method                    | Other        | no  | no  | NR  | No             |
| 31 | Kulasingam SL       | Sex Health                               | 2008 | Australia                                | CC vs Commercial method | CC and Commercial method             | >LSIL        | Yes | Yes | Yes | No             |
| 32 | Kulasingam SL       | Cost Eff Resour Alloc                    | 2008 | UK                                       | CC vs Commercial method | CC and Commercial method             | Other        | Yes | Yes | Yes | No             |
| 33 | Kim JJ              | N Engl J Med                             | 2008 | USA                                      | CC vs Commercial method | CC and Commercial method             | LSIL<br>HSIL | No  | No  | No  | Private+Public |
| 34 | Jit M               | BMJ                                      | 2008 | UK                                       | CC vs Commercial method | CC and Commercial method             | LSIL<br>HSIL | No  | No  | Yes | Public         |
| 35 | Dasbach EJ          | Asian Pacific J Cancer Prev              | 2008 | Taiwan                                   | CC vs Commercial method | CC and Commercial method             | HSIL         | Yes | No  | Yes | No             |
| 36 | Dasbach EJ          | Expert Rev Pharmacoeconomics Outcome Res | 2008 | Norway                                   | CC vs Commercial method | CC and Commercial method             | HSIL         | Yes | Yes | Yes | No             |
| 37 | Goldie SJ           | Vaccine                                  | 2008 | Latin America and Carribean              | CC vs Commercial method | CC <sup>c</sup>                      | LSIL<br>HSIL | No  | No  | No  | Private        |
| 38 | Goldie SJ           | Vaccine                                  | 2008 | Asia Pacific Region                      | CC vs Commercial method | CC or Commercial method <sup>c</sup> | LSIL<br>HSIL | No  | No  | No  | Private        |
| 39 | Rogoza RM           | Vaccine                                  | 2008 | Canada, the Netherlands, Taiwan, UK, USA | CC vs Commercial method | CC and Commercial method             | Other        | No  | No  | Yes | No             |
| 40 | Suarez E            | Vaccine                                  | 2008 | Chile, Finland, Ireland Poland,          | CC vs Commercial method | CC and Commercial method             | LSIL         | Yes | No  | Yes | No             |

|    |               |                         |      |             |                                       |                                      |       |     |     |     |         |
|----|---------------|-------------------------|------|-------------|---------------------------------------|--------------------------------------|-------|-----|-----|-----|---------|
|    |               |                         |      | Taiwan      |                                       |                                      | HSIL  |     |     |     |         |
| 41 | Coupe VMH     | BJOG                    | 2007 | Netherlands | CC vs Commercial method               | CC and Commercial method             | HSIL  | No  | No  | NR  | No      |
| 42 | Sheriff SK    | Eur J Health Econ       | 2007 | Germany     | CC vs Commercial method               | Commercial method                    | HSIL  | Yes | Yes | Yes | No      |
| 43 | Goldie SJ     | Vaccine                 | 2007 | Brazil      | CC vs Commercial method               | CC or Commercial method <sup>p</sup> | LSIL  | No  | No  | No  | Private |
|    |               |                         |      |             |                                       |                                      | HSIL  |     |     |     |         |
| 44 | Brisson M     | Vaccine                 | 2007 | Canada      | CC vs Commercial method               | CC and Commercial method             | LSIL  | No  | No  | Yes | No      |
|    |               |                         |      |             |                                       |                                      | HSIL  |     |     |     |         |
| 45 | Gingsberg GM  | Vaccine                 | 2007 | Israel      | CC vs Commercial method               | CC                                   | LSIL  | No  | No  | NR  | No      |
| 46 | Insinga RP    | Vaccine                 | 2007 | Mexico      | CC vs Commercial method               | CC and Commercial method             | LSIL  | Yes | Yes | Yes | No      |
|    |               |                         |      |             |                                       |                                      | HSIL  |     |     |     |         |
| 47 | Elbasha EH    | Emerg Infect Dis        | 2007 | USA         | CC vs Commercial method               | CC and Commercial method             | HSIL  | Yes | No  | Yes | No      |
| 48 | Capri S       | Italian J Public Health | 2007 | Italy       | CC vs Commercial method               | CC and Commercial method             | LSIL  | No  | No  | NR  | No      |
|    |               |                         |      |             |                                       |                                      | HSIL  |     |     |     |         |
| 49 | Kulasingam SL | Obstet Gynecol          | 2006 | USA         | Only different CC strategies involved | CC                                   | >LSIL | No  | No  | No  | Public  |
| 50 | Kulasingam SL | J Natl Cancer Inst      | 2006 | USA         | CC vs Commercial method               | Commercial method                    | Other | No  | Yes | No  | Public  |
| 51 | Legood R      | BMJ                     | 2006 | UK          | CC vs Commercial method               | CC and Commercial method             | Other | No  | No  | No  | Public  |

|    |                   |                                           |      |                                            |                         |                          |               |    |     |     |        |
|----|-------------------|-------------------------------------------|------|--------------------------------------------|-------------------------|--------------------------|---------------|----|-----|-----|--------|
| 52 | Berkhof J         | Int J Cancer                              | 2006 | Netherlands                                | CC vs Commercial method | Commercial method        | >LSIL HSIL    | No | No  | No  | Public |
| 53 | Lier D            | Alberta Cervical Cancer Screening Program | 2005 | Canada                                     | CC vs Commercial method | CC and Commercial method | LSIL Other    | No | No  | NR  | Public |
| 54 | Goldie SJ         | New Engl J Med                            | 2005 | India, Kenya, Peru, South Africa, Thailand | CC vs Commercial method | Commercial method        | HSIL          | No | No  | No  | Public |
| 55 | Neville MA        | ANZ Obstet Gynecol                        | 2005 | Australia                                  | CC vs Commercial method | Commercial method        | Other         | No | No  | NR  | No     |
| 56 | Kim JJ            | J Natl Cancer Inst                        | 2005 | UK                                         | CC vs Commercial method | Commercial method        | >LSIL         | No | No  | No  | Public |
| 57 | Hughes AA         | Diagn Cytopathol                          | 2005 | USA                                        | CC vs Commercial method | Commercial method        | Other         | No | No  | NR  | No     |
| 58 | Novoa Vasquez     | Rev Esp Salud Publica                     | 2004 | Mexico                                     | CC vs Commercial method | CC                       | >LSIL         | No | No  | No  | No     |
| 59 | Kim JJ            | J Public Health                           | 2004 | Hong Kong                                  | CC vs Commercial method | CC or Commercial method  | Other         | No | No  | NR  | No     |
| 60 | Sherlaw-Johnson C | Br J Cancer                               | 2004 | UK                                         | CC vs Commercial method | Commercial method        | LSIL<br>Other | No | No  | NR  | No     |
| 61 | Karnon J          | Health Technol Assess                     | 2004 | UK                                         | CC vs Commercial method | Commercial method        | LSIL<br>Other | No | No  | No  | Public |
| 62 | Goldie SJ         | Obstet Gynecol                            | 2004 | USA                                        | CC vs Commercial method | Commercial method        | Other         | No | No  | No  | Public |
| 63 | Goldie SJ         | J Natl Cancer Inst                        | 2004 | USA                                        | CC vs Commercial method | CC and Commercial method | Other         | No | Yes | Yes | Public |

|    |                 |                     |      |                       |                                       |                          |              |     |     |     |                |
|----|-----------------|---------------------|------|-----------------------|---------------------------------------|--------------------------|--------------|-----|-----|-----|----------------|
| 64 | Taira AV        | Emerg Infect Dis    | 2004 | USA                   | CC vs Commercial method               | CC and Commercial method | >LSIL        | No  | No  | No  | Public         |
| 65 | Lytwyn          | Arch Pathol Lab Med | 2003 | Canada                | CC vs Commercial method               | CC and Commercial method | HSIL         | Yes | No  | NR  | No             |
| 66 | Mittendorf T    | Eur J Health Econ   | 2003 | Germany               | CC vs Commercial method               | CC and Commercial method | Other        | No  | Yes | Yes | Public         |
| 67 | Sanders GD      | Emerg Infect Dis    | 2003 | USA                   | CC vs Commercial method               | CC and Commercial method | >LSIL        | No  | No  | No  | No             |
| 68 | Kulasingam SL   | JAMA                | 2003 | USA                   | CC vs Commercial method               | CC and Commercial method | HSIL         | No  | Yes | Yes | No             |
| 69 | Maxwell LG      | Obstet Gynecol      | 2002 | USA                   | CC vs Commercial method               | Commercial method        | >LSIL        | No  | No  | Yes | Private+Public |
| 70 | Mandelblatt J   | J Natl Cancer Inst  | 2002 | Thailand              | CC vs Commercial method               | CC and Commercial method | LSIL<br>HSIL | No  | No  | No  | No             |
| 71 | Kim JJ          | JAMA                | 2002 | USA                   | CC vs Commercial method               | CC and Commercial method | LSIL<br>HSIL | No  | No  | Yes | Public         |
| 72 | Mandelblatt J   | JAMA                | 2002 | USA                   | CC vs Commercial method               | CC and Commercial method | LSIL<br>HSIL | No  | No  | Yes | No             |
| 73 | Van den Akker E | J Natl Cancer Inst  | 2002 | High income countries | Only different CC strategies involved | CC                       | >LSIL        | No  | No  | No  | Private+Public |
| 74 | Goldie SJ       | Am J Med            | 2001 | USA                   | CC vs Commercial method               | CC and Commercial method | Other        | No  | No  | No  | Public         |
| 75 | Goldie SJ       | JAMA                | 2001 | South Africa          | CC vs Commercial method               | Commercial               | Other        | No  | Yes | Yes | Private        |

|    |                    |                       |      |             |                                       | method                   |                       |    |     |     |         |
|----|--------------------|-----------------------|------|-------------|---------------------------------------|--------------------------|-----------------------|----|-----|-----|---------|
| 76 | Montz FJ           | Obstet Gynecol        | 2001 | USA         | CC vs Commercial method               | Commercial method        | >LSIL                 | No | Yes | Yes | No      |
| 77 | Taylor LA          | Arch Fam Med          | 2000 | USA         | CC vs Commercial method               | Commercial method        | >LSIL                 | No | Yes | Yes | No      |
| 78 | Myers ER           | Obstet Gynecol        | 2000 | USA         | Only different CC strategies involved | CC                       | >LSIL                 | No | No  | No  | Public  |
| 79 | Hutchinson ML      | Am J Manag Care       | 2000 | USA         | CC vs Commercial method               | Commercial method        | LSIL<br>HSIL<br>Other | No | Yes | No  | No      |
| 80 | Goldie SJ          | Ann Intern Med        | 1999 | USA         | Only different CC strategies involved | CC                       | Other                 | No | No  | No  | Public  |
| 81 | Brown AD           | JAMA                  | 1999 | USA         | CC vs Commercial method               | Commercial method        | Other                 | No | No  | No  | Private |
| 82 | Cuzick J           | Health Technol Assess | 1999 | UK          | CC vs Commercial method               | CC and Commercial method | LSIL<br>HSIL          | No | No  | No  | No      |
| 83 | van Ballegooijen M | Br J Cancer           | 1997 | Netherlands | CC vs Commercial method               | CC                       | >LSIL                 | No | No  | No  | Public  |
| 84 | Matsunaga G        | J Epidemiol           | 1997 | Japan       | Only different CC strategies involved | CC                       | Other                 | No | No  | No  | No      |
| 85 | Schechter CB       | Acta Cytol            | 1996 | USA         | CC vs Commercial method               | Commercial method        | LSIL<br>HSIL          | No | No  | Yes | No      |
| 86 | Fahs MC            | Ann Intern Med        | 1992 | USA         | Only different CC strategies involved | CC                       | Other                 | No | No  | No  | Public  |
| 87 | Koopmanschap MA    | Int J Cancer          | 1990 | Netherlands | Only different CC strategies involved | CC                       | Other                 | No | No  | No  | Public  |



|    |               |      |      |     |                                       |    |       |    |    |    |    |
|----|---------------|------|------|-----|---------------------------------------|----|-------|----|----|----|----|
| 88 | Mandelblatt J | JAMA | 1988 | USA | Only different CC strategies involved | CC | Other | No | No | No | No |
|----|---------------|------|------|-----|---------------------------------------|----|-------|----|----|----|----|

CC: conventional cytology

<sup>a</sup> Vaccination is cost-effective strategy if cost per dose is 0.60 \$ or 2 \$

<sup>b</sup> Vaccination is cost-effective strategy if cost per vaccinated girl is < 25 \$

<sup>c</sup> Vaccination is cost-effective if cost per vaccinated girl is < 10 \$

**Table B:** Eligible CEAs not included in the analyses

| Appendix reference No | Author        | Journal                                      | Year | Country                    | Strategies incorporated               | Preferred strategy                   | Grade | Affiliation with manufacturer | Funding from manufacturer | Conflict of interest | Other source of funding |
|-----------------------|---------------|----------------------------------------------|------|----------------------------|---------------------------------------|--------------------------------------|-------|-------------------------------|---------------------------|----------------------|-------------------------|
| 89                    | TOMBOLA Group | BMJ                                          | 2009 | UK                         | CC vs other strategy *                | CC                                   | Other | No                            | No                        | Yes                  | Public                  |
| 90                    | Perovic S     | J BUON                                       | 2009 | Serbia                     | Only different CC strategies involved | CC                                   | Other | No                            | No                        | NR                   | Public                  |
| 91                    | Sinanovic E   | Vaccine                                      | 2009 | South Africa               | CC vs Commercial method               | CC or Commercial method <sup>a</sup> | Other | No                            | No                        | No                   | Private                 |
| 92                    | Oddsson K     | Acta Obstetrica et Gynecologica Scandinavica | 2009 | Iceland                    | CC vs Commercial method               | CC and Commercial method             | Other | No                            | No                        | No                   | No                      |
| 93                    | Dee A         | Eur J Public Health                          | 2009 | Ireland                    | CC vs Commercial method               | CC and Commercial method             | Other | No                            | No                        | No                   | No                      |
| 94                    | Bistolletti P | Int J Cancer                                 | 2008 | Sweden                     | CC vs Commercial method               | CC and Commercial method             | Other | No                            | No                        | No                   | Public                  |
| 95                    | Goldie SJ     | Vaccine                                      | 2008 | 72 GAVI-eligible countries | CC vs Commercial method               | CC <sup>b</sup>                      | Other | No                            | No                        | No                   | Private                 |
| 96                    | Chesson HW    | Emerg Infect Dis                             | 2008 | USA                        | CC vs Commercial method               | CC and Commercial method             | Other | No                            | No                        | No                   | No                      |
| 97                    | Usher C       | Vaccine                                      | 2008 | Ireland                    | CC vs Commercial method               | CC and Commercial method             | Other | No                            | No                        | No                   | No                      |

|     |                                                    |                                      |      |                         |                                       |                          |       |    |    |     |                |
|-----|----------------------------------------------------|--------------------------------------|------|-------------------------|---------------------------------------|--------------------------|-------|----|----|-----|----------------|
| 98  | Favato G                                           | HCVI, Henley Discussion Paper Series | 2007 | Italy                   | CC vs Commercial method               | CC and Commercial method | Other | No | No | NR  | No             |
| 99  | Boot HJ                                            | Vaccine                              | 2007 | The Netherlands         | CC vs Commercial method               | CC and Commercial method | Other | No | No | Yes | No             |
| 100 | Kim JJ                                             | Br J Cancer                          | 2007 | UK                      | CC vs Commercial method               | CC <sup>c</sup>          | Other | No | No | NR  | Public+Private |
| 101 | Norwegian Knowledge Centre for the Health Services | NOKC Report                          | 2007 | Norway                  | CC vs Commercial method               | CC and Commercial method | Other | No | No | NR  | No             |
| 102 | Danish Health Technology Assessment                | Health Technological Assess          | 2007 | Denmark                 | CC vs Commercial method               | CC and Commercial method | Other | No | No | NR  | No             |
| 103 | Koong SL                                           | J Med Screening                      | 2006 | Taiwan                  | Only different CC strategies involved | CC                       | Other | No | No | No  | No             |
| 104 | Legood R                                           | Int J Cancer                         | 2005 | India                   | Only different CC strategies involved | CC                       | Other | No | No | No  | Private        |
| 105 | Dewilde S                                          | Med Decision Making                  | 2004 | UK,USA,Australia, Japan | Only different CC strategies involved | CC                       | Other | No | No | No  | Public         |
| 106 | Straughn JM                                        | J Low Genit Tract Dis                | 2004 | USA                     | CC vs Commercial method               | Commercial method        | Other | No | No | NR  | No             |
| 107 | Suba EJ                                            | Cancer                               | 2001 | Vietnam                 | Only different CC strategies involved | CC                       | Other | No | No | No  | Public+Private |
| 108 | Raab S                                             | Am J Clin Pathol                     | 1999 | USA                     | CC vs Commercial method               | CC                       | Other | No | No | No  | No             |
| 109 | Raab S                                             | Am J Clin Pathol                     | 1999 | USA                     | Only different CC strategies involved | CC                       | Other | No | No | No  | No             |

CC: conventional cytology

<sup>a</sup> Vaccination is cost-effective strategy only if vaccine cost is lower than (not estimated) <sup>b</sup> Vaccination is cost-effective strategy if cost per vaccinated girl is < 10 \$

<sup>c</sup> Vaccination is cost-effective strategy if cost per vaccinated individual is < 50 \$ \*CC versus colposcopy

**Table C:** Eligible CEAs unable to retrieve in fulltext

| Appendix reference No | Author    | Journal              | Year | Country | Strategies incorporated               | Preferred strategy | Grade | Affiliation with manufacturer | Funding from manufacturer | Conflict of interest | Other source of funding |
|-----------------------|-----------|----------------------|------|---------|---------------------------------------|--------------------|-------|-------------------------------|---------------------------|----------------------|-------------------------|
| 110                   | Hsaïri M, | Tunis Med            | 2000 | Tunisia | Only different CC strategies involved | CC                 | NR    | NR                            | NR                        | NR                   | NR                      |
| 111                   | Smith BL, | J Reprod Med         | 1999 | USA     | CC vs Commercial method               | Commercial method  | NR    | NR                            | NR                        | NR                   | NR                      |
| 112                   | Carter PM | J Am Board Fam Pract | 1993 | USA     | Only different CC strategies involved | CC                 | NR    | NR                            | NR                        | NR                   | NR                      |
| 113                   | Massad LS | J Reprod Med         | 1993 | USA     | CC vs Commercial method               | Commercial method  | NR    | NR                            | NR                        | NR                   | NR                      |
| 114                   | Boon ME   | Acta Cytol           | 1981 | NR      | Only different CC strategies involved | CC                 | NR    | NR                            | NR                        | NR                   | NR                      |

CC: conventional cytology

NR; not retrievable data

**Table D:** Characteristics of cost-effectiveness studies involving the Pap test for cervical cancer screening or prevention and of those that provided sensitivity/specificity estimates for the Pap test

|                     | <b>All studies<br/>N=109</b> | <b>Studies providing sensitivity/<br/>specificity estimates for Pap test<br/>N=88</b> | <b>Non-eligible studies<br/>N=21</b> |
|---------------------|------------------------------|---------------------------------------------------------------------------------------|--------------------------------------|
| Journal             |                              |                                                                                       |                                      |
| General medicine    | <b>25 (22.9)</b>             | <b>22 (25)</b>                                                                        | <b>3 (14.3)</b>                      |
| Other               | <b>84 (77.1)</b>             | <b>66 (75)</b>                                                                        | <b>18 (85.7)</b>                     |
| Year of publication |                              |                                                                                       |                                      |
| - 2005              | <b>42 (38.5)</b>             | <b>36 (40.9)</b>                                                                      | <b>6 (28.6)</b>                      |
| 2006 – 2010         | <b>67 (61.5)</b>             | <b>52 (59.1)</b>                                                                      | <b>15 (71.4)</b>                     |
| Country, N (%)      |                              |                                                                                       |                                      |
| USA                 | <b>30 (27.5)</b>             | <b>26 (29.5)</b>                                                                      | <b>4 (19.0)</b>                      |
| Europe              | <b>37 (33.9)</b>             | <b>27 (30.7)</b>                                                                      | <b>10 (47.6)</b>                     |
| Multinational       | <b>10 (9.2)</b>              | <b>8 (9.1)</b>                                                                        | <b>2 (9.5)</b>                       |
| Other               | <b>32 (29.4)</b>             | <b>27 (30.7)</b>                                                                      | <b>5 (23.8)</b>                      |

|                                                         |                   |                  |                  |
|---------------------------------------------------------|-------------------|------------------|------------------|
| Strategies compared, N (%)                              |                   |                  |                  |
| CC different strategies                                 | <b>15 (13.9)*</b> | <b>9 (10.2)</b>  | <b>6 (30.0)*</b> |
| CC vs commercial method                                 | <b>93 (86.1)</b>  | <b>79 (89.8)</b> | <b>14 (70.0)</b> |
| Number of strategies, N (%)                             |                   |                  |                  |
| 2                                                       | <b>28 (25.7)</b>  | <b>21 (23.9)</b> | <b>7 (33.3)</b>  |
| 3                                                       | <b>14 (12.8)</b>  | <b>10 (11.4)</b> | <b>4 (19.1)</b>  |
| >3                                                      | <b>67 (61.5)</b>  | <b>57 (64.8)</b> | <b>10 (47.6)</b> |
| Preferred strategy as most cost-effective, ** N (%)     |                   |                  |                  |
| CC                                                      | <b>8 (8.6)</b>    | <b>5 (6.3)</b>   | <b>3 (21.4)</b>  |
| Commercial method                                       | <b>23 (24.7)</b>  | <b>22 (27.8)</b> | <b>1 (7.2)</b>   |
| CC and commercial method                                | <b>58 (62.4)</b>  | <b>48 (60.8)</b> | <b>10 (71.4)</b> |
| CC or commercial method                                 | <b>4 (4.3)</b>    | <b>4 (5.1)</b>   | -                |
| Vaccines involved or only screening strategies involved |                   |                  |                  |
| Vaccine involved                                        | <b>54 (49.5)</b>  | <b>43 (48.9)</b> | <b>11 (52.4)</b> |
| Only screening strategies involved                      | <b>55 (50.5)</b>  | <b>45 (51.1)</b> | <b>10 (47.6)</b> |

|                                     |                  |                  |                  |
|-------------------------------------|------------------|------------------|------------------|
| Pap test threshold, N (%)           |                  |                  |                  |
| ASCUS                               | <b>28 (25.7)</b> | <b>28 (31.8)</b> | -                |
| HGSIL                               | <b>1 (0.9)</b>   | <b>1 (1.1)</b>   | -                |
| No data available                   | <b>80 (73.4)</b> | <b>59 (67)</b>   | <b>21 (100)</b>  |
| Grade of lesions, N (%)             |                  |                  |                  |
| CIN1                                | <b>2 (1.8)</b>   | <b>2 (2.3)</b>   | -                |
| >CIN1                               | <b>14 (12.8)</b> | <b>14 (15.9)</b> | -                |
| >CIN2                               | <b>39 (35.8)</b> | <b>39 (44.3)</b> | -                |
| Other                               | <b>33 (30.3)</b> | <b>33 (37.5)</b> | -                |
| No data available                   | <b>21 (19.3)</b> | -                | <b>21 (100)</b>  |
| Number of references given, N (%)   |                  |                  |                  |
| 0                                   | <b>28 (25.7)</b> | <b>13 (14.8)</b> | <b>15 (71.4)</b> |
| 1                                   | <b>25 (22.9)</b> | <b>24 (27.3)</b> | <b>1 (4.8)</b>   |
| 2                                   | <b>18 (16.5)</b> | <b>17 (19.3)</b> | <b>1 (4.8)</b>   |
| >2                                  | <b>38 (34.9)</b> | <b>34 (38.6)</b> | <b>4 (19.0)</b>  |
| Reference to a meta-analysis, N (%) |                  |                  |                  |

|     |                  |                  |                  |
|-----|------------------|------------------|------------------|
| Yes | <b>41 (37.6)</b> | <b>39 (44.3)</b> | <b>2 (9.5)</b>   |
| No  | <b>68 (62.4)</b> | <b>49 (55.7)</b> | <b>19 (90.5)</b> |

CC: conventional cytology (Pap test)

\*Included N=108 in all studies and N=20 in non-eligible studies because of the exclusion of one study [89 appendix reference] compared conventional cytology versus colposcopy which is a non-commercial strategy

\* Included only studies involving the comparison of CC vs a commercial method (N=93 in all studies included, N=79 in studies eligible for analysis and N=14 in non-eligible studies)

**Table E:** Stratified analysis for sensitivity and specificity among baseline estimates, higher and lower ranges, adopted in cost-effectiveness analyses according to the inclusion of a vaccine or screening strategies only

|                                     | Vaccine involved (n=43)     |                             | Screening only (n=45)       |                             |
|-------------------------------------|-----------------------------|-----------------------------|-----------------------------|-----------------------------|
|                                     | Sensitivity – lower - upper | Specificity – lower - upper | Sensitivity – lower - upper | Specificity – lower – upper |
| Author affiliated with manufacturer |                             |                             |                             |                             |
| Yes                                 | 61 (6) – 44 (7) – 79 (2)**  | 96 (1) – 90 (0) – 99 (0)    | 55 (9)-NA- NA               | 85 (12)-NA-NA               |
| No                                  | 67 (13) – 43 (12) – 88 (11) | 95 (2) – 81 (23) – 97 (3)   | 63 (14)-51 (16)-81 (16)     | 94 (4)-85 (10)-97 (4)       |
| Funding from the manufacturer       |                             |                             |                             |                             |
| Yes                                 | 60 (7)** – 45 (8) – 85 (8)  | 96 (1) – 86 (5) – 98 (1)    | 51 (6)***-37 (10)-74 (14)   | 94 (3)-NA-NA                |
| No                                  | 68 (12) – 42 (12) – 86 (11) | 95 (2) – 80 (29) – 97 (4)   | 65 (14)-52 (15)-82 (16)     | 93 (6)-85 (10)-97 (4)       |



|                                                                             |                             |                           |                          |                       |
|-----------------------------------------------------------------------------|-----------------------------|---------------------------|--------------------------|-----------------------|
| Conflict of interest with the manufacturer                                  |                             |                           |                          |                       |
| Yes                                                                         | 63(8)-41(10)-84(9)          | 96(1)-77(28)-99(1)        | 58(13)-53(19)-81(16)     | 94(3)-86(12)-98(1)    |
| No                                                                          | 69 (13)-46(12)-90(7)        | 96(3)-89(7)-96(4)         | 66(13)-50(16)-83(12)     | 95(3)-85(10)-97(3)    |
| Not reported                                                                | 56(8)-35(1)-73(18)          | 95(0)-88-99               | 56(16)-55(10)-73(26)     | 87(10)-82(10)-95(8)   |
| Author affiliation or funding from the manufacturer                         |                             |                           |                          |                       |
| Yes                                                                         | 60 (6)**- 44 (7) – 85 (8)   | 96 (1) – 86 (5) – 98 (1)  | 53 (7)*-37 (10)-74 (14)  | 90 (9)-80 (0)-97 (0)  |
| No                                                                          | 69 (13)- 42 (12) – 86 (12)  | 95 (2) – 80 (29) – 97 (4) | 65 (14)-52 (16)-82 (16)  | 94 (4)-85 (10)-97 (4) |
| Author affiliation or funding or conflict of interest with the manufacturer |                             |                           |                          |                       |
| Yes                                                                         | 61 (8) ***-42 (9)- 85 (9)   | 96 (1) – 78 (26) – 98 (1) | 58 (12)*-52 (17)-79 (15) | 92 (7)-86 (12)-98 (1) |
| No                                                                          | 74 (11)-46 (13)- 91 (7)     | 95 (3) – 92 (5) – 95 (5)  | 67 (12)-51 (16)-84 (11)  | 95 (3)-85 (9)-97 (3)  |
| Other funding reported                                                      |                             |                           |                          |                       |
| Yes                                                                         | 72 (12) -43 (13) -91 (7)**  | 95 (2) – 80 (27) -97 (3)  | 64 (13)-48 (15)-82 (13)  | 95 (3)-85 (11)-98 (2) |
| No                                                                          | 60 (7)** – 43 (7) – 79 (10) | 96 (1) – 87 (5) – 99 (1)  | 60 (15)-57 (15)-80 (20)  | 92 (7)-85 (8)-96 (6)  |

Values represent mean and values in parentheses represent standard deviations (SD)

NA; non-applicable

\* if p<0.05 \* \* if p<0.01 \*\*\*if p<0.001 \*\*\*\*if p<0.0001

**Table F:** Baseline assumptions for sensitivity and specificity adopted for high grade and low grade lesions in eligible cost-effectiveness analyses

LSIL

HSIL

Appendix to: Polyzos NP, Valachis A, Mauri D, et al. Industry involvement and baseline assumptions of cost-effectiveness analyses: diagnostic accuracy of the Papanicolaou test. CMAJ 2011. DOI:10.1503/cmaj.101506.

Copyright © 2011 Canadian Medical Association or its licensors

|                                                                             | <b>Sensitivity</b> | <b>Specificity</b> | <b>Sensitivity</b> | <b>Specificity</b> |
|-----------------------------------------------------------------------------|--------------------|--------------------|--------------------|--------------------|
| Vaccines or only screening strategies involved                              |                    |                    |                    |                    |
| Vaccine involved                                                            | 59 (13)            | 94 (4)             | 68 (12)            | 96 (1)             |
| Only screening strategies involved                                          | 54 (16)            | 93 (8)             | 64 (12)            | 93 (7)             |
| Author affiliated with manufacturer                                         |                    |                    |                    |                    |
| Yes                                                                         | 48 (16)            | 96 (1)             | 59 (5)             | 93 (8)             |
| No                                                                          | 60 (13)            | 95 (4)             | 70 (12)*           | 95 (2)             |
| Funding from the manufacturer                                               |                    |                    |                    |                    |
| Yes                                                                         | 46 (13)            | 96 (2)             | 57 (4)             | 95 (2)             |
| No                                                                          | 62 (12)**          | 94 (4)             | 70 (12)****        | 95 (2)             |
| Conflict of interest with the manufacturer                                  |                    |                    |                    |                    |
| Yes                                                                         | 56 (15)            | 93 (6)             | 63 (10)            | 95 (3)             |
| No                                                                          | 59 (15)            | 96 (2)             | 71 (11)            | 95 (2)             |
| Not reported                                                                | 56 (10)            | 96 (1)             | 54 (14)            | 71                 |
| Author affiliation or funding from the manufacturer                         |                    |                    |                    |                    |
| Yes                                                                         | 47 (13)            | 96 (2)             | 58 (5)             | 93 (7)             |
| No                                                                          | 62 (12)**          | 94 (4)             | 71 (12)***         | 95 (2)             |
| Author affiliation or funding or conflict of interest with the manufacturer |                    |                    |                    |                    |
| Yes                                                                         | 52 (14)            | 94 (5)             | 62 (10)            | 94 (6)             |
| No                                                                          | 63(14)*            | 96 (1)             | 73 (11)**          | 95 (2)             |
| Other funding reported                                                      |                    |                    |                    |                    |
| Yes                                                                         | 63 (14)            | 91 (7)             | 72 (12)            | 95 (2)             |
| No                                                                          | 53 (13)*           | 96 (2)             | 61 (9)**           | 94 (6)             |

*Values represent mean and values in parentheses represent standard deviations (SD)*

\* if  $p < 0.05$  \* \* if  $p < 0.01$  \*\*\*if  $p < 0.001$  \*\*\*\*if  $p < 0.0001$

## Appendix Reference list

1. Levin CE, Sellors J, Shi JF, Ma L, Qiao YL, Ortendahl J, et al. Cost-effectiveness analysis of cervical cancer prevention based on a rapid human papillomavirus screening test in a high-risk region of China. *Int J Cancer*. 2010;127:1404-11.
2. Liu PH, Hu FC, Lee PI, Chow SN, Huang CW, Wang JD. Cost-effectiveness of human papillomavirus vaccination for prevention of cervical cancer in Taiwan. *BMC Health Serv Res*. 2010;10:11.
3. Dasbach EJ, Nagy L, Brandtmüller A, Elbasha EH. The cost effectiveness of a quadrivalent human papillomavirus vaccine (6/11/16/18) in Hungary. *J Med Econ*. 2010;13:110-8.
4. Kulasingam SL, Rajan R, St Pierre Y, Atwood CV, Myers ER, Franco EL. Human papillomavirus testing with Pap triage for cervical cancer prevention in Canada: a cost-effectiveness analysis. *BMC Med*. 2009;7:69
5. Chuck A. Cost-Effectiveness of 21 Alternative Cervical Cancer Screening Strategies. *Value Health*. 2009 Sep 25.
6. Vijayaraghavan A, Efrusy M, Lindeque G, Dreyer G, Santas C. Cost effectiveness of high-risk HPV DNA testing for cervical cancer screening in South Africa. *Gynecol Oncol*. 2009;112:377-83

7. Coupé VM, van Ginkel J, de Melker HE, Snijders PJ, Meijer CJ, Berkhof J. HPV16/18 vaccination to prevent cervical cancer in The Netherlands: model-based cost-effectiveness. *Int J Cancer*. 2009;124:970-8.
8. Mennini FS, Giorgi Rossi P, Palazzo F, Langeron N. Health and economic impact associated with a quadrivalent HPV vaccine in Italy. *Gynecol Oncol*. 2009;112:370-6.
9. Thiry N, De Laet C, Hulstaert F, Neyt M, Huybrechts M, Cleemput I. Cost-effectiveness of human papillomavirus vaccination in Belgium: do not forget about cervical cancer screening. *Int J Technol Assess Health Care*. 2009;25:161-70.
10. Anonychuk AM, Bauch CT, Merid MF, Van Krieking G, Demarteau N. A cost utility analysis of cervical cancer vaccination in preadolescent Canadian females. *BMC Public Health*. 2009;9:401.
11. Colantonio L, Gómez JA, Demarteau N, Standaert B, Pichón-Rivière A, Augustovski F. Cost-effectiveness analysis of a cervical cancer vaccine in five Latin American countries. *Vaccine*. 2009;27:5519-29.
12. Coupé VM, de Melker HE, Snijders PJ, Meijer CJ, Berkhof J. How to screen for cervical cancer after HPV16/18 vaccination in The Netherlands. *Vaccine*. 2009;27:5111-9.
13. de Kok IM, van Ballegooijen M, Habbema JD. Cost-effectiveness analysis of human papillomavirus vaccination in the Netherlands. *J Natl Cancer Inst*. 2009;101:1083-92.

14. Kim JJ, Goldie SJ. Cost effectiveness analysis of including boys in a human papillomavirus vaccination programme in the United States. *BMJ*. 2009 Oct 8;339:b3884.
15. Reynales-Shigematsu LM, Rodrigues ER, Lazcano-Ponce E. Cost-effectiveness analysis of a quadrivalent human papilloma virus vaccine in Mexico. *Arch Med Res*. 2009;40:503-13.
16. Rogoza RM, Westra TA, Ferko N, Tamminga JJ, Drummond MF, Daemen T, et al. Cost-effectiveness of prophylactic vaccination against human papillomavirus 16/18 for the prevention of cervical cancer: adaptation of an existing cohort model to the situation in the Netherlands. *Vaccine*. 2009;27:4776-83.
17. Zechmeister I, Blasio BF, Garnett G, Neilson AR, Siebert U. Cost-effectiveness analysis of human papillomavirus-vaccination programs to prevent cervical cancer in Austria. *Vaccine*. 2009;27:5133-41
18. Annemans L, Rémy V, Oyee J, Langeron N. Cost-effectiveness evaluation of a quadrivalent human papillomavirus vaccine in Belgium. *Pharmacoeconomics*. 2009;27:231-45.
19. Kim JJ, Ortendahl J, Goldie SJ. Cost-effectiveness of human papillomavirus vaccination and cervical cancer screening in women older than 30 years in the United States. *Ann Intern Med*. 2009;151:538-45.
20. Ginsberg GM, Edejer TT, Lauer JA, Sepulveda C. Screening, prevention and treatment of cervical cancer -- a global and regional generalized cost-effectiveness analysis. *Vaccine*. 2009;27:6060-79.

21. Kim JJ, Kobus KE, Diaz M, O'Shea M, Van Minh H, Goldie SJ. Exploring the cost-effectiveness of HPV vaccination in Vietnam: insights for evidence-based cervical cancer prevention policy. *Vaccine*. 2008;26:4015-24.
22. Krahn M, McLachlin M, Pham B, Rosen B, Sander B, Grootendorst P, et al. Liquid-based techniques for cervical cancer screening: systematic review and cost-effectiveness analysis [Technology report number 103]. Ottawa: Canadian Agency for Drugs and Technologies in Health; 2008.
23. Andrés-Gamboa O, Chicaíza L, García-Molina M, Díaz J, González M, Murillo R, et al. Cost-effectiveness of conventional cytology and HPV DNA testing for cervical cancer screening in Colombia. *Salud Publica Mex*. 2008;50:276-85.
24. Anderson R, Haas M, Shanahan M. The cost-effectiveness of cervical screening in Australia: what is the impact of screening at different intervals or over a different age range? *Aust N Z J Public Health*. 2008;32:43-52.
25. Bergeron C, Langeron N, McAllister R, Mathevet P, Remy V. Cost-effectiveness analysis of the introduction of a quadrivalent human papillomavirus vaccine in France. *Int J Technol Assess Health Care*. 2008;24:10-9
26. Szucs TD, Langeron N, Dedes KJ, Rafia R, Bénard S. Cost-effectiveness analysis of adding a quadrivalent HPV vaccine to the cervical cancer screening programme in Switzerland. *Curr Med Res Opin*. 2008;24:1473-83.
27. Diaz M, Kim JJ, Albero G, de Sanjosé S, Clifford G, Bosch FX, et al. Health and economic impact of HPV 16 and 18 vaccination and cervical cancer screening in India. *Br J Cancer*. 2008;99:230-8.

28. Goldhaber-Fiebert JD, Stout NK, Salomon JA, Kuntz KM, Goldie SJ. Cost-effectiveness of cervical cancer screening with human papillomavirus DNA testing and HPV-16,18 vaccination. *J Natl Cancer Inst.* 2008;100:308-20.
29. Dasbach EJ, Insinga RP, Elbasha EH. The epidemiological and economic impact of a quadrivalent human papillomavirus vaccine (6/11/16/18) in the UK. *BJOG.* 2008;115:947-56.
30. Gutiérrez-Delgado C, Báez-Mendoza C, González-Pier E, de la Rosa AP, Witlen R. Generalized cost-effectiveness of preventive interventions against cervical cancer in Mexican women: results of a Markov model from the public sector perspective. *Salud Publica Mex.* 2008;50:107-18.
31. Kulasingam S, Connelly L, Conway E, Hocking JS, Myers E, Regan DG, et al. A cost-effectiveness analysis of adding a human papillomavirus vaccine to the Australian National Cervical Cancer Screening Program. *Sex Health.* 2007;4:165-75.
32. Kulasingam SL, Benard S, Barnabas RV, Langeron N, Myers ER. Adding a quadrivalent human papillomavirus vaccine to the UK cervical cancer screening programme: A cost-effectiveness analysis. *Cost Eff Resour Alloc.* 2008 Feb 15;6:4.
33. Kim JJ, Goldie SJ. Health and economic implications of HPV vaccination in the United States. *N Engl J Med.* 2008;359:821-32.
34. Jit M, Choi YH, Edmunds WJ. Economic evaluation of human papillomavirus vaccination in the United Kingdom. *BMJ.* 2008 Jul 17;337:a769.

35. Dasbach EJ, Insinga RP, Yang YC, Pwu RF, Lac C, Elbasha EH. The cost-effectiveness of a quadrivalent human papillomavirus vaccine in Taiwan. *Asian Pac J Cancer Prev*. 2008;9:459-66.
36. Dasbach EJ, Llargeron N, Elbasha EH. Assessment of the cost-effectiveness of a quadrivalent HPV vaccine in Norway using a dynamic transmission model. *Expert Rev Pharmacoecon Outcomes Res*. 2008;8:491-500.
37. Goldie SJ, Diaz M, Constenla D, Alvis N, Andrus JK, Kim SY. Mathematical models of cervical cancer prevention in Latin America and the Caribbean. *Vaccine*. 2008;26 Suppl 11:L59-72.
38. Goldie SJ, Diaz M, Kim SY, Levin CE, Van Minh H, Kim JJ. Mathematical models of cervical cancer prevention in the Asia Pacific region. *Vaccine*. 2008;26 Suppl 12:M17-29.
39. Rogoza RM, Ferko N, Bentley J, Meijer CJ, Berkhof J, Wang KL, et al. Optimization of primary and secondary cervical cancer prevention strategies in an era of cervical cancer vaccination: a multi-regional health economic analysis. *Vaccine*. 2008;26 Suppl 5:F46-58.
40. Suárez E, Smith JS, Bosch FX, Nieminen P, Chen CJ, Torvinen S, et al. Cost-effectiveness of vaccination against cervical cancer: a multi-regional analysis assessing the impact of vaccine characteristics and alternative vaccination scenarios. *Vaccine*. 2008;26 Suppl 5:F29-45.



41. Coupé VM, Berkhof J, Verheijen RH, Meijer CJ. Cost-effectiveness of human papillomavirus testing after treatment for cervical intraepithelial neoplasia. *BJOG*. 2007;114:416-24.
42. Sheriff SK, Petry KU, Ikenberg H, Crouse G, Mazonson PD, Santas CC. An economic analysis of human papillomavirus triage for the management of women with atypical and abnormal Pap smear results in Germany. *Eur J Health Econ*. 2007;8:153-60.
43. Goldie SJ, Kim JJ, Kobus K, Goldhaber-Fiebert JD, Salomon J, O'shea MK, et al. Cost-effectiveness of HPV 16, 18 vaccination in Brazil. *Vaccine*. 2007;25:6257-70.
44. Brisson M, Van de Velde N, De Wals P, Boily MC. The potential cost-effectiveness of prophylactic human papillomavirus vaccines in Canada. *Vaccine*. 2007;25:5399-408.
45. Ginsberg GM, Fisher M, Ben-Shahar I, Bornstein J. Cost-utility analysis of vaccination against HPV in Israel. *Vaccine*. 2007;25:6677-91.
46. Insinga RP, Dasbach EJ, Elbasha EH, Puig A, Reynales-Shigematsu LM. Cost-effectiveness of quadrivalent human papillomavirus (HPV) vaccination in Mexico: a transmission dynamic model-based evaluation. *Vaccine*. 2007;26:128-39.
47. Elbasha EH, Dasbach EJ, Insinga RP. Model for assessing human papillomavirus vaccination strategies. *Emerg Infect Dis*. 2007;13:28-41.

48. Capri S, Bamfi F, Marocco A, Demarteau. Impatto clinic ed economic della vaccinazione anti-HPV. *Ital J Public Health* 2007; 4(2suppl): 36-5.
49. Kulasingam SL, Myers ER, Lawson HW, McConnell KJ, Kerlikowske K, Melnikow J, et al. Cost-effectiveness of extending cervical cancer screening intervals among women with prior normal pap tests. *Obstet Gynecol.* 2006;107:321-8.
50. Kulasingam SL, Kim JJ, Lawrence WF, Mandelblatt JS, Myers ER, Schiffman M, et al; ALTS Group. Cost-effectiveness analysis based on the atypical squamous cells of undetermined significance/low-grade squamous intraepithelial lesion Triage Study (ALTS). *J Natl Cancer Inst.* 2006;98:92-100.
51. Legood R, Gray A, Wolstenholme J, Moss S. Lifetime effects, costs, and cost effectiveness of testing for human papillomavirus to manage low grade cytological abnormalities: results of the NHS pilot studies. *BMJ.* 2006;332:79-85
52. Berkhof J, de Bruijne MC, Zielinski GD, Bulkman NW, Rozendaal L, Snijders PJ, et al. Evaluation of cervical screening strategies with adjunct high-risk human papillomavirus testing for women with borderline or mild dyskaryosis. *Int J Cancer.* 2006;118:1759-68.
53. Lier D, Jacobs P. An economic analysis of the introduction of liquid-based cytology (LBC) and Human Papillomavirus (HPV) testing in Alberta. Calgary: Alberta Cervical Cancer Screening Program; 2005.
54. Goldie SJ, Gaffikin L, Goldhaber-Fiebert JD, Gordillo-Tobar A, Levin C, Mahé C, et al; Alliance for Cervical Cancer Prevention Cost Working Group. Cost-effectiveness of cervical-cancer screening in five developing countries. *N Engl J Med.* 2005;353:2158-68.

55. Neville AM, Quinn MA. An alternative cost effectiveness analysis of ThinPrep in the Australian setting. *Aust N Z J Obstet Gynaecol.* 2005 Aug;45(4):289-94. Erratum in: *Aust N Z J Obstet Gynaecol.* 2005;45:352.
56. Kim JJ, Wright TC, Goldie SJ. Cost-effectiveness of human papillomavirus DNA testing in the United Kingdom, The Netherlands, France, and Italy. *J Natl Cancer Inst.* 2005;97:888-95.
57. Hughes AA, Glazner J, Barton P, Shlay JC. A cost-effectiveness analysis of four management strategies in the determination and follow-up of atypical squamous cells of undetermined significance. *Diagn Cytopathol.* 2005;32:125-32.
58. Novoa Vázquez RM. Cost-effectiveness of a cervical cancer screening programme in the Algarve region, Portugal. *Rev Esp Salud Publica.* 2004;78:341-53.
59. Kim JJ, Leung GM, Woo PP, Goldie SJ. Cost-effectiveness of organized versus opportunistic cervical cytology screening in Hong Kong. *J Public Health (Oxf).* 2004;26:130-7.
60. Sherlaw-Johnson C, Philips Z. An evaluation of liquid-based cytology and human papillomavirus testing within the UK cervical cancer screening programme. *Br J Cancer.* 2004;91:84-91.
61. Karnon J, Peters J, Platt J, Chilcott J, McGoogan E, Brewer N. Liquid-based cytology in cervical screening: an updated rapid and systematic review and economic analysis. *Health Technol Assess.* 2004;8:1-78.

62. Goldie SJ, Kim JJ, Wright TC. Cost-effectiveness of human papillomavirus DNA testing for cervical cancer screening in women aged 30 years or more. *Obstet Gynecol.* 2004;103:619-31.
63. Goldie SJ, Kohli M, Grima D, Weinstein MC, Wright TC, Bosch FX, et al. Projected clinical benefits and cost-effectiveness of a human papillomavirus 16/18 vaccine. *J Natl Cancer Inst.* 2004;96:604-15.
64. Taira AV, Neukermans CP, Sanders GD. Evaluating human papillomavirus vaccination programs. *Emerg Infect Dis.* 2004;10:1915-23.
65. Lytwyn A, Sellors JW, Mahony JB, Daya D, Chapman W, Howard M, et al. Adjunctive human papillomavirus testing in the 2-year follow-up of women with low-grade cervical cytologic abnormalities: a randomized trial and economic evaluation. *Arch Pathol Lab Med.* 2003;127:1169-75.
66. Mittendorf T, Petry KU, Iftner T, Greiner W, von der Schulenburg JM. Economic evaluation of human papillomavirus screening in Germany. *Eur J Health Econ.* 2003;4:209-15.
67. Sanders GD, Taira AV. Cost-effectiveness of a potential vaccine for human papillomavirus. *Emerg Infect Dis.* 2003;9:37-48.
68. Kulasingam SL, Myers ER. Potential health and economic impact of adding a human papillomavirus vaccine to screening programs. *JAMA.* 2003;290:781-9.
69. Maxwell GL, Carlson JW, Ochoa M, Krivak T, Rose GS, Myers ER. Costs and effectiveness of alternative strategies for cervical cancer screening in military beneficiaries. *Obstet Gynecol.* 2002;100:740-8.

70. Mandelblatt JS, Lawrence WF, Gaffikin L, Limpahayom KK, Lumbiganon P, Warakamin S, et al. Costs and benefits of different strategies to screen for cervical cancer in less-developed countries. *J Natl Cancer Inst.* 2002;94:1469-83.
71. Kim JJ, Wright TC, Goldie SJ. Cost-effectiveness of alternative triage strategies for atypical squamous cells of undetermined significance. *JAMA.* 2002;287:2382-90.
72. Mandelblatt JS, Lawrence WF, Womack SM, Jacobson D, Yi B, Hwang YT, et al. Benefits and costs of using HPV testing to screen for cervical cancer. *JAMA.* 2002;287:2372-81.
73. van den Akker-van Marle ME, van Ballegooijen M, van Oortmarsen GJ, Boer R, Habbema JD. Cost-effectiveness of cervical cancer screening: comparison of screening policies. *J Natl Cancer Inst.* 2002;94:193-204.
74. Goldie SJ, Freedberg KA, Weinstein MC, Wright TC, Kuntz KM. Cost effectiveness of human papillomavirus testing to augment cervical cancer screening in women infected with the human immunodeficiency virus. *Am J Med.* 2001;111:140-9.
75. Goldie SJ, Kuhn L, Denny L, Pollack A, Wright TC. Policy analysis of cervical cancer screening strategies in low-resource settings: clinical benefits and cost-effectiveness. *JAMA.* 2001;285:3107-15.
76. Montz FJ, Farber FL, Bristow RE, Cornelison T. Impact of increasing Papanicolaou test sensitivity and compliance: a modeled cost and outcomes analysis. *Obstet Gynecol.* 2001;97:781-8.

77. Taylor LA, Sorensen SV, Ray NF, Halpern MT, Harper DM. Cost-effectiveness of the conventional papanicolaou test with a new adjunct to cytological screening for squamous cell carcinoma of the uterine cervix and its precursors. *Arch Fam Med*. 2000;9:713-21.
78. Myers ER, McCrory DC, Subramanian S, McCall N, Nanda K, Datta S, et al. Setting the target for a better cervical screening test: characteristics of a cost-effective test for cervical neoplasia screening. *Obstet Gynecol*. 2000;96:645-52.
79. Hutchinson ML, Berger BM, Farber FL. Clinical and cost implications of new technologies for cervical cancer screening: the impact of test sensitivity. *Am J Manag Care*. 2000;6:766-80.
80. Goldie SJ, Weinstein MC, Kuntz KM, Freedberg KA. The costs, clinical benefits, and cost-effectiveness of screening for cervical cancer in HIV-infected women. *Ann Intern Med*. 1999;130:97-107.
81. Brown AD, Garber AM. Cost-effectiveness of 3 methods to enhance the sensitivity of Papanicolaou testing. *JAMA*. 1999;281:347-53.
82. Cuzick J, Sasieni P, Davies P, Adams J, Normand C, Frater A, et al. A systematic review of the role of human papillomavirus testing within a cervical screening programme. *Health Technol Assess*. 1999;3:1-196.
83. van Ballegooijen M, van den Akker-van Marle ME, Warmerdam PG, Meijer CJ, Walboomers JM, Habbema JD. Present evidence on the value of HPV testing for cervical cancer screening: a model-based exploration of the (cost-)effectiveness. *Br J Cancer*. 1997;76:651-7.
84. Matsunaga G, Tsuji I, Sato S, Fukao A, Hisamichi S, Yajima A. Cost-effective analysis of mass screening for cervical cancer in Japan. *J Epidemiol*. 1997;7:135-41.

85. Schechter CB. Cost-effectiveness of rescreening conventionally prepared cervical smears by PAPNET testing. *Acta Cytol.* 1996;40:1272-82.
86. Fahs MC, Mandelblatt J, Schechter C, Muller C. Cost effectiveness of cervical cancer screening for the elderly. *Ann Intern Med.* 1992;117:520-7.
87. Koopmanschap MA, van Oortmarssen GJ, van Agt HM, van Ballegooijen M, Habbema JD, Lubbe KT. Cervical-cancer screening: attendance and cost-effectiveness. *Int J Cancer.* 1990;45:410-5.
88. Mandelblatt JS, Fahs MC. The cost-effectiveness of cervical cancer screening for low-income elderly women. *JAMA.* 1988;259:2409-13.
89. TOMBOLA Group. Options for managing low grade cervical abnormalities detected at screening: cost effectiveness study. *BMJ.* 2009;339:b2549.
90. Perovic S. Prevention of cervical cancer with screening programme in Branicevo District and cost-effectiveness analysis adjusted to the territory of the Republic of Serbia. *J BUON.* 2009;14:93-6.
91. Sinanovic E, Moodley J, Barone MA, Mall S, Cleary S, Harries J. The potential cost-effectiveness of adding a human papillomavirus vaccine to the cervical cancer screening programme in South Africa. *Vaccine.* 2009;27:6196-202.

92. Oddsson K, Johannsson J, Asgeirsdottir TL, Gudnason T. Cost-effectiveness of human papilloma virus vaccination in Iceland. *Acta Obstet Gynecol Scand.* 2009;88:1411-6.
93. Dee A, Howell F. A cost-utility analysis of adding a bivalent or quadrivalent HPV vaccine to the Irish cervical screening programme. *Eur J Public Health.* 2010;20:213-9.
94. Bistoletti P, Sennfält K, Dillner J. Cost-effectiveness of primary cytology and HPV DNA cervical screening. *Int J Cancer.* 2008;122:372-6.
95. Goldie SJ, O'Shea M, Campos NG, Diaz M, Sweet S, Kim SY. Health and economic outcomes of HPV 16,18 vaccination in 72 GAVI-eligible countries. *Vaccine.* 2008;26:4080-93.
96. Chesson HW, Ekwueme DU, Saraiya M, Markowitz LE. Cost-effectiveness of human papillomavirus vaccination in the United States. *Emerg Infect Dis.* 2008;14:244-51.
97. Usher C, Tilson L, Olsen J, Jepsen M, Walsh C, Barry M. Cost-effectiveness of human papillomavirus vaccine in reducing the risk of cervical cancer in Ireland due to HPV types 16 and 18 using a transmission dynamic model. *Vaccine.* 2008;26:5654-61.
98. Favato G, Pieri V, Mills RW. Cost/Effective Analysis of anti-HPV Vaccination Programme in Italy: a Multi-Cohort Markov Model, Henley Discussion Paper Series (HCVI HDP No. 13, February 2007).



99. Boot HJ, Wallenburg I, de Melker HE, Mangen MJ, Gerritsen AA, van der Maas NA, et al. Assessing the introduction of universal human papillomavirus vaccination for preadolescent girls in The Netherlands. *Vaccine*. 2007;25:6245-56.
100. Kim JJ, Andres-Beck B, Goldie SJ. The value of including boys in an HPV vaccination programme: a cost-effectiveness analysis in a low-resource setting. *Br J Cancer*. 2007;97:1322-8.
101. Neilson A, Freiesleben de Blasio B. Economic evaluation of the human papillomavirus (HPV)-vaccination in Norway. Oslo: Norwegian Knowledge Centre for the Health Services; 2007.
102. Danish Centre for Evaluation and Health Technology Assessment. Reduction in the risk of cervical cancer by vaccination against human papillomavirus (HPV) - a health technology assessment. Danish Centre for Evaluation and Health Technology Assessment (DACEHTA). *Health Technology Assessment* 2007;9(1).
103. Koong SL, Yen AM, Chen TH. Efficacy and cost-effectiveness of nationwide cervical cancer screening in Taiwan. *J Med Screen*. 2006;13 Suppl 1:S44-7.
104. Legood R, Gray AM, Mahé C, Wolstenholme J, Jayant K, Nene BM, et al. Screening for cervical cancer in India: How much will it cost? A trial based analysis of the cost per case detected. *Int J Cancer*. 2005;117:981-7.
105. Dewilde S, Anderson R. The cost-effectiveness of screening programs using single and multiple birth cohort simulations: a comparison using a model of cervical cancer. *Med Decis Making*. 2004;24:486-92.

106. Straughn JM Jr, Numnum TM, Rocconi RP, Leath CA 3rd, Partridge EE. A cost-effectiveness analysis of screening strategies for cervical intraepithelial neoplasia. *J Low Genit Tract Dis.* 2004;8:280-4.
107. Suba EJ, Nguyen CH, Nguyen BD, Raab SS; Viet/American Cervical Cancer Prevention Project. De novo establishment and cost effectiveness of Papanicolaou cytology screening services in the Socialist Republic of Vietnam. *Cancer.* 2001;91:928-39.
108. Raab SS, Zaleski MS, Silverman JF. The cost-effectiveness of the cytology laboratory and new cytology technologies in cervical cancer prevention. *Am J Clin Pathol.* 1999;111:259-66.
109. Raab SS, Bishop NS, Zaleski MS. Cost effectiveness of rescreening cervicovaginal smears. *Am J Clin Pathol.* 1999;111:601-9.
110. Hsaïri M, Fakhfakh R, Ghyoula M, Ben Abdallah M, Achour N. Cost effectiveness of cervical cancer screening strategies in Tunisia. *Tunis Med.* 2000;78:557-61.
111. Smith BL, Lee M, Leader S, Wertlake P. Economic impact of automated primary screening for cervical cancer. *J Reprod Med.* 1999;44:518-28.
112. Carter PM, Coburn TC, Luszczak M. Cost-effectiveness of cervical cytologic examination during pregnancy. *J Am Board Fam Pract.* 1993 Nov-Dec;6(6):537-45.

113. Massad LS, Lonky NM, Mutch DG, Mann WJ, Blanco JS, Vasilev SA, et al. Use of speculoscopy in the evaluation of women with atypical Papanicolaou smears. Improved cost effectiveness by selective colposcopy. *J Reprod Med.* 1993;38:163-9.
114. Boon ME, de Graaff Guilloud JC. Cost effectiveness of population screening and rescreening for cervical cancer in the Netherlands. *Acta Cytol.* 1981;25:539-42.
